# Supplementary material
Source: PubMed Central journal article supplement (PMC8317593)

**The Initiation of Symptomatic Medications during Clinical Trials for  
Mild Cognitive Impairment:  
Supplemental Material**

Table A1. Characteristics of ADNI Prodromal participants grouped by whether or not the participant initiated a symptomatic medication during the course of follow-up. P-values are from Pearson's  $\chi^2$  test or Kruskal-Wallis test.

|                                            | N   | On symptomatic medication at baseline (N=154) | Initiated symptomatic medication (N=75) | Never Initiated symptomatic medication (N=204) | Combined (N=433) | P-value |
|--------------------------------------------|-----|-----------------------------------------------|-----------------------------------------|------------------------------------------------|------------------|---------|
| eMCI at baseline                           | 433 | 51 (33%)                                      | 37 (49%)                                | 121 (59%)                                      | 209 (48%)        | <0.001  |
| Age (years)                                | 433 | 72.23 (6.72)                                  | 73.49 (6.87)                            | 72.22 (7.61)                                   | 72.45 (7.18)     | 0.301   |
| Sex (female)                               | 433 | 61 (40%)                                      | 33 (44%)                                | 96 (47%)                                       | 190 (44%)        | 0.372   |
| Education (years)                          | 433 | 16.10 (2.90)                                  | 15.59 (2.62)                            | 15.97 (2.89)                                   | 15.95 (2.85)     | 0.316   |
| Ethnicity                                  | 433 |                                               |                                         |                                                |                  | 0.526   |
| Not Hispanic/Latinx                        |     | 148 (96%)                                     | 73 (97%)                                | 200 (98%)                                      | 421 (97%)        |         |
| Hispanic/Latinx                            |     | 6 (4%)                                        | 2 (3%)                                  | 3 (1%)                                         | 11 (3%)          |         |
| Unknown                                    |     | 0 (0%)                                        | 0 (0%)                                  | 1 (0%)                                         | 1 (0%)           |         |
| Race                                       | 433 |                                               |                                         |                                                |                  | 0.436   |
| Am. Indian/Alaskan                         |     | 0 (0%)                                        | 0 (0%)                                  | 0 (0%)                                         | 0 (0%)           |         |
| Asian                                      |     | 0 (0%)                                        | 1 (1%)                                  | 3 (1%)                                         | 4 (1%)           |         |
| Hawaiian/Pacific Islander                  |     | 0 (0%)                                        | 0 (0%)                                  | 1 (0%)                                         | 1 (0%)           |         |
| Black                                      |     | 2 (1%)                                        | 1 (1%)                                  | 9 (4%)                                         | 12 (3%)          |         |
| White                                      |     | 150 (97%)                                     | 71 (95%)                                | 188 (92%)                                      | 409 (94%)        |         |
| More than one                              |     | 2 (1%)                                        | 2 (3%)                                  | 3 (1%)                                         | 7 (2%)           |         |
| Unknown                                    |     | 0 (0%)                                        | 0 (0%)                                  | 0 (0%)                                         | 0 (0%)           |         |
| Marital status                             | 433 |                                               |                                         |                                                |                  | 0.142   |
| Divorced                                   |     | 10 (6%)                                       | 5 (7%)                                  | 29 (14%)                                       | 44 (10%)         |         |
| Married                                    |     | 128 (83%)                                     | 60 (80%)                                | 145 (71%)                                      | 333 (77%)        |         |
| Never married                              |     | 4 (3%)                                        | 1 (1%)                                  | 7 (3%)                                         | 12 (3%)          |         |
| Widowed                                    |     | 12 (8%)                                       | 9 (12%)                                 | 21 (10%)                                       | 42 (10%)         |         |
| Unknown                                    |     | 0 (0%)                                        | 0 (0%)                                  | 2 (1%)                                         | 2 (0%)           |         |
| APOE $\epsilon$ 4 alleles                  | 430 |                                               |                                         |                                                |                  | 0.051   |
| 0                                          |     | 60 (40%)                                      | 26 (35%)                                | 99 (49%)                                       | 185 (43%)        |         |
| 1                                          |     | 63 (42%)                                      | 39 (52%)                                | 85 (42%)                                       | 187 (43%)        |         |
| 2                                          |     | 28 (19%)                                      | 10 (13%)                                | 20 (10%)                                       | 58 (13%)         |         |
| CSF A $\beta$ <sub>1-42</sub> (pg/ml)      | 363 | 800 (379)                                     | 826 (387)                               | 1150 (476)                                     | 969 (461)        | <0.001  |
| Florbetapir PET (SUVR)                     | 347 | 1.367 (0.213)                                 | 1.337 (0.197)                           | 1.244 (0.207)                                  | 1.300 (0.215)    | <0.001  |
| CDR Sum of Boxes                           | 433 | 1.740 (0.933)                                 | 1.627 (0.847)                           | 1.235 (0.763)                                  | 1.483 (0.872)    | <0.001  |
| ADAS-Cog 13                                | 433 | 18.55 (6.61)                                  | 18.29 (6.71)                            | 13.69 (5.79)                                   | 16.21 (6.68)     | <0.001  |
| MMSE                                       | 432 | 27.44 (1.76)                                  | 27.52 (1.74)                            | 28.04 (1.66)                                   | 27.73 (1.73)     | 0.001   |
| Hippocampus (/ICVx1,000)                   | 433 | 4.370 (0.757)                                 | 4.404 (0.727)                           | 4.795 (0.760)                                  | 4.576 (0.779)    | <0.001  |
| Follow-up (years)                          | 365 | 4.37 (2.82)                                   | 5.32 (2.09)                             | 4.25 (2.77)                                    | 4.48 (2.70)      | 0.004   |
| Exposure to symptomatic medication (years) | 433 | -                                             | 3.218 (1.801)                           | -                                              | -                | -       |

Abbreviations: eMCI, Early Mild Cognitive Impairment; PET, positron emission tomography; SUVR, standard uptake value ratio; CDR, Clinical Dementia Rating; ADAS-Cog, Alzheimer's Disease Assessment Scale – Cognitive subscale; MMSE, Mini Mental State Exam; ICV, Intracranial Volume

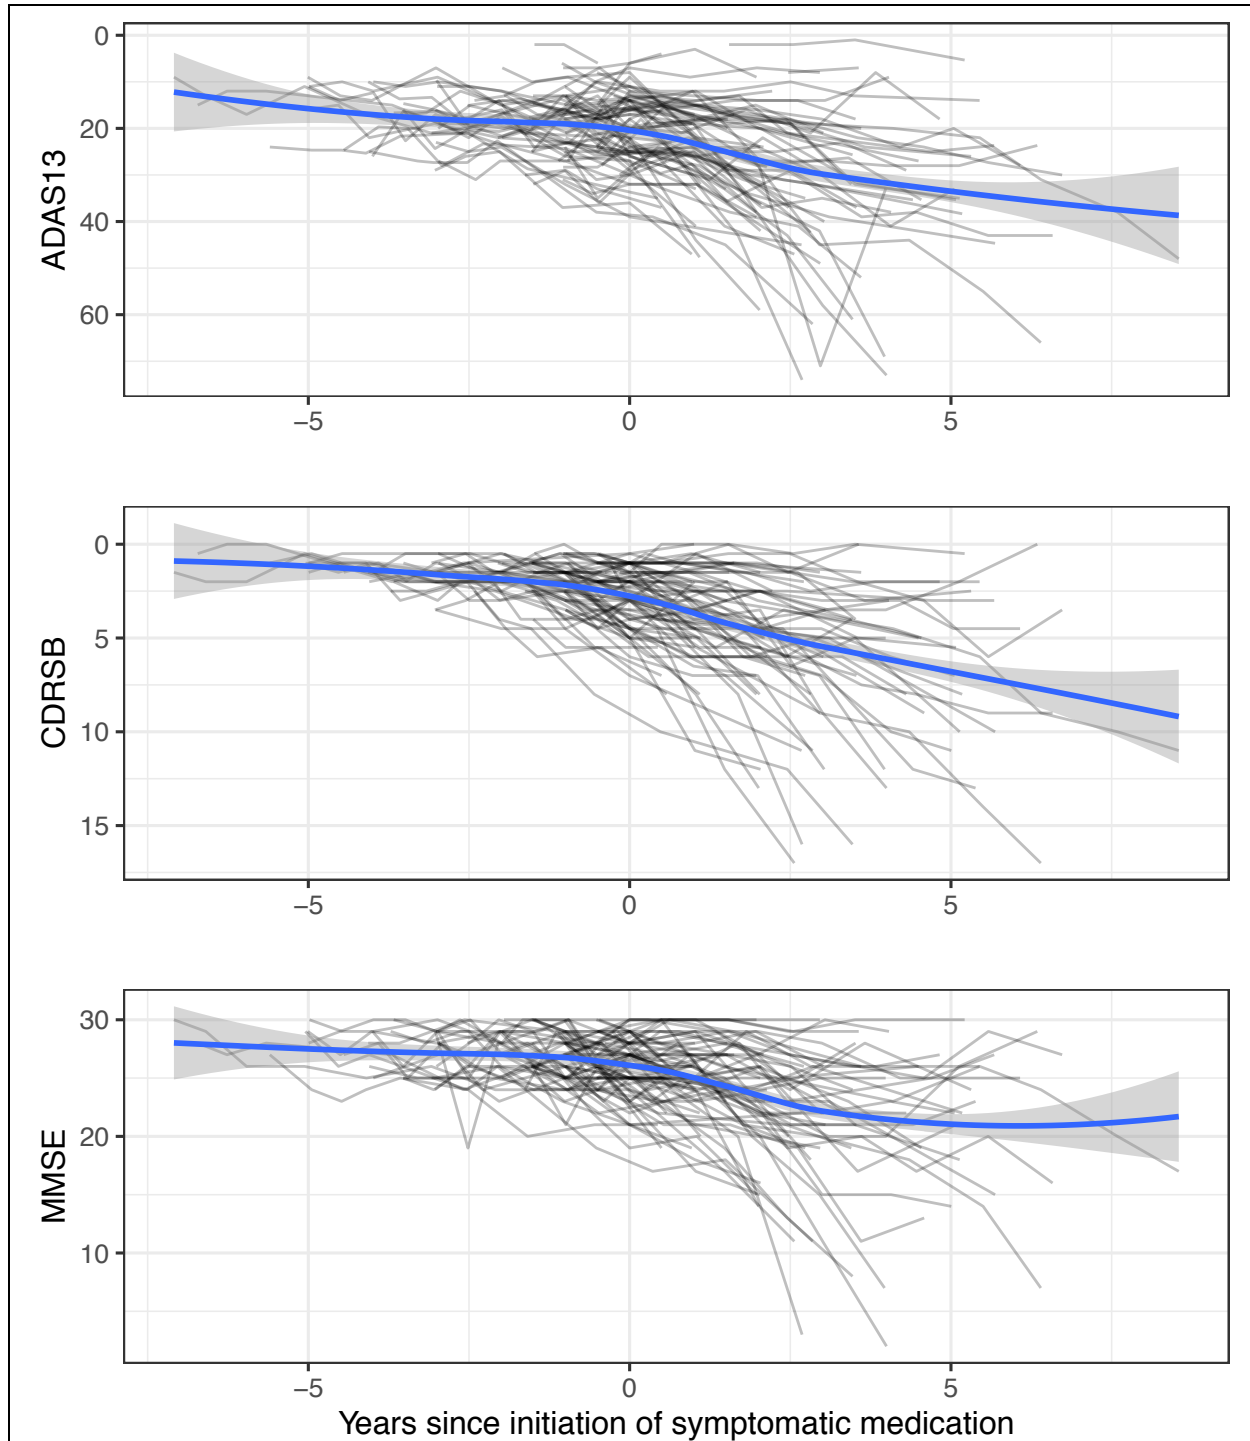

**Figure A1.** Spaghetti plots of ADAS13, CDRSB, and MMSE relative to time of initiation of symptomatic medication for ADNI Prodromal participants who initiated symptomatic medication. The blue trend lines estimated by LOESS do not demonstrate a cognitive *improvement* soon after time 0, even though a benefit relative to no treatment cannot be ruled out. Shaded regions depict 95% confidence intervals, not accounting for repeated measures.

Abbreviations: ADAS13, Alzheimer's Disease Assessment Scale - 13 item cognitive subscale; CDRSB, Clinical Dementia Rating Sum of Boxes; MMSE, Mini Mental State Exam; LOESS, LOcally Estimated Scatterplot Smoothing.

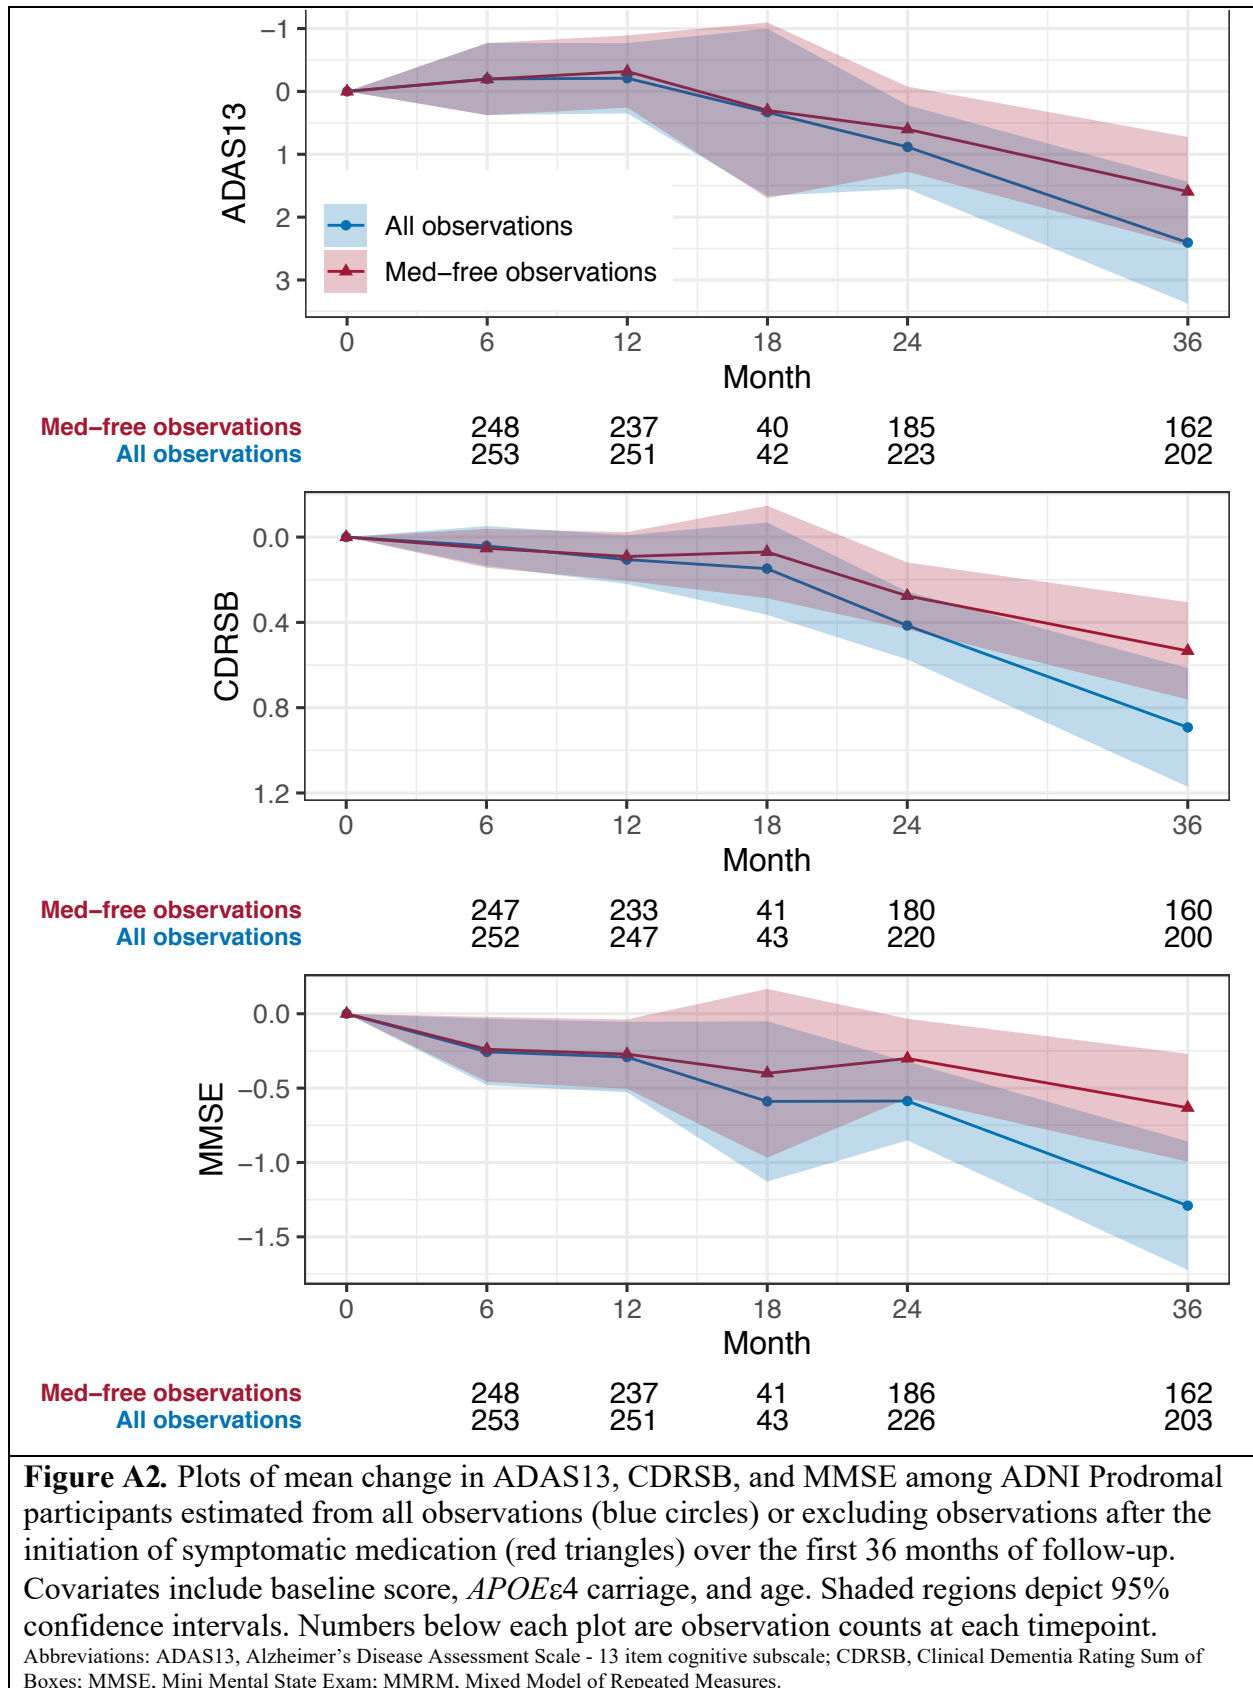

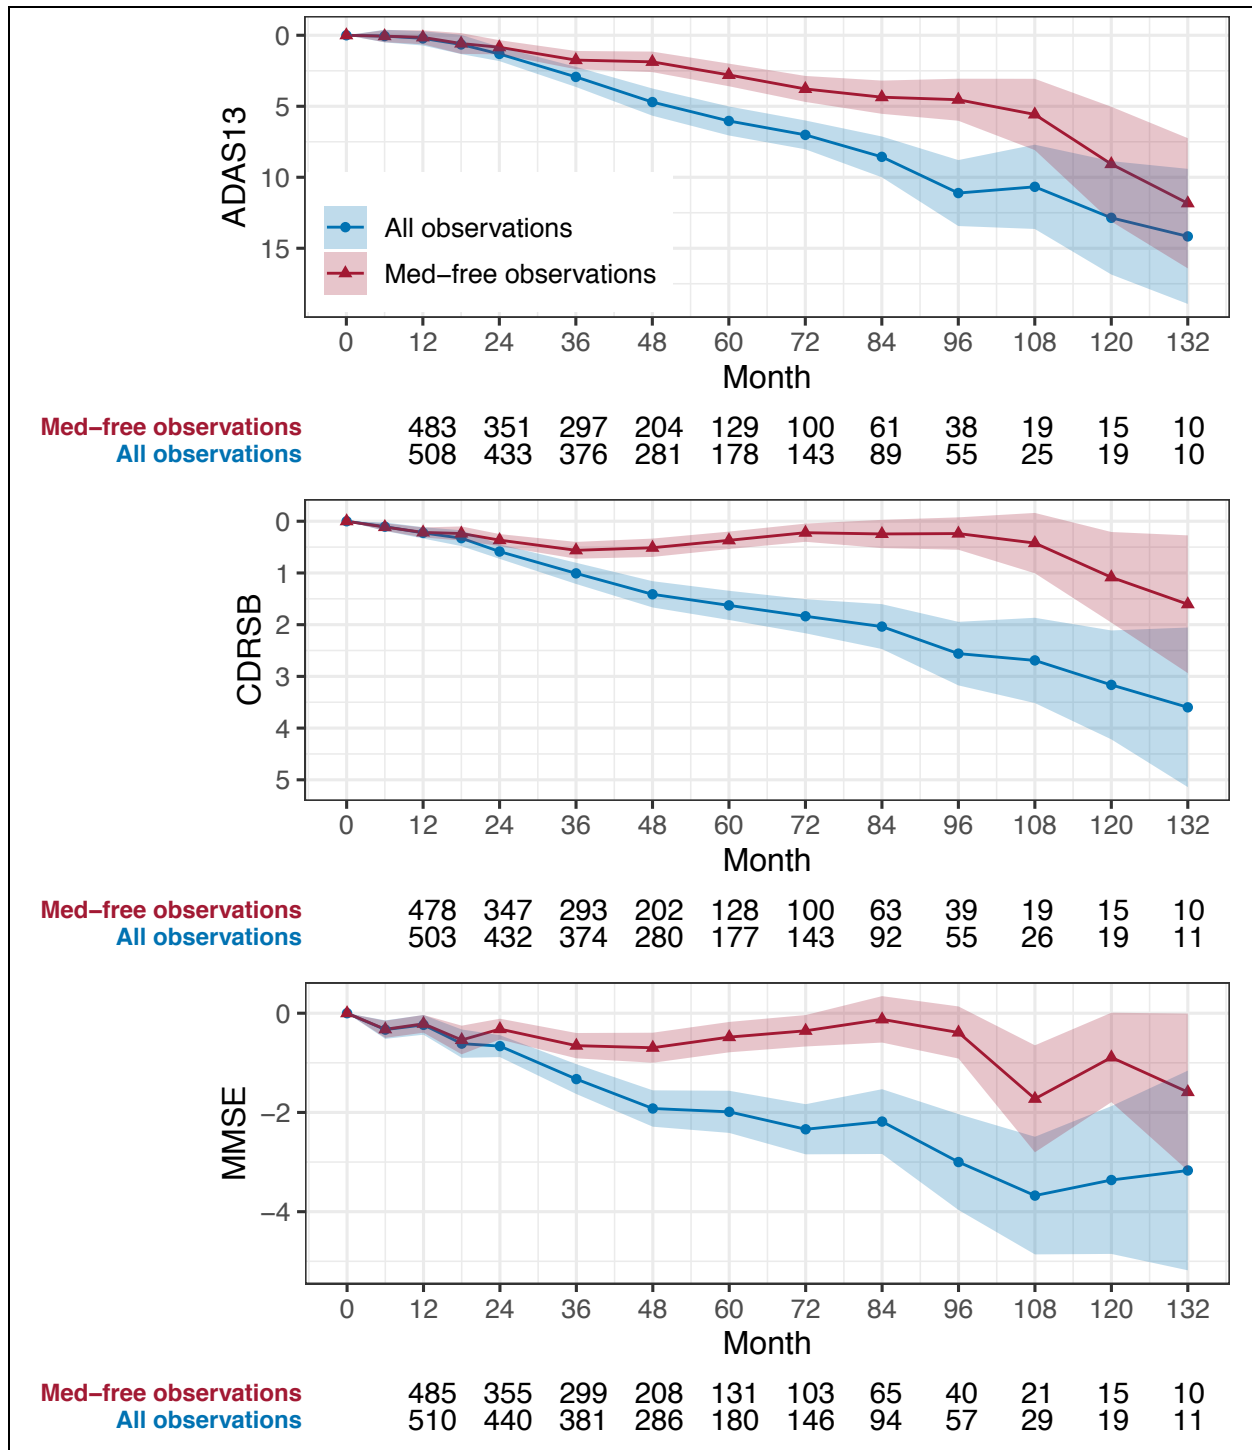

**Figure A3.** Plots of mean change in ADAS13, CDRSB, and MMSE among ADNI MCI participants estimated from all observations (blue circles) or excluding observations after the initiation of symptomatic medication (red triangles) over 132 months of follow-up. Covariates include baseline score, *APOE* $\epsilon$ 4 carriage, and age. Shaded regions depict 95% confidence intervals. Numbers below each plot are observation counts at each timepoint.

Abbreviations: ADAS13, Alzheimer’s Disease Assessment Scale - 13 item cognitive subscale; CDRSB, Clinical Dementia Rating Sum of Boxes; MMSE, Mini Mental State Exam; MMRM, Mixed Model of Repeated Measures.

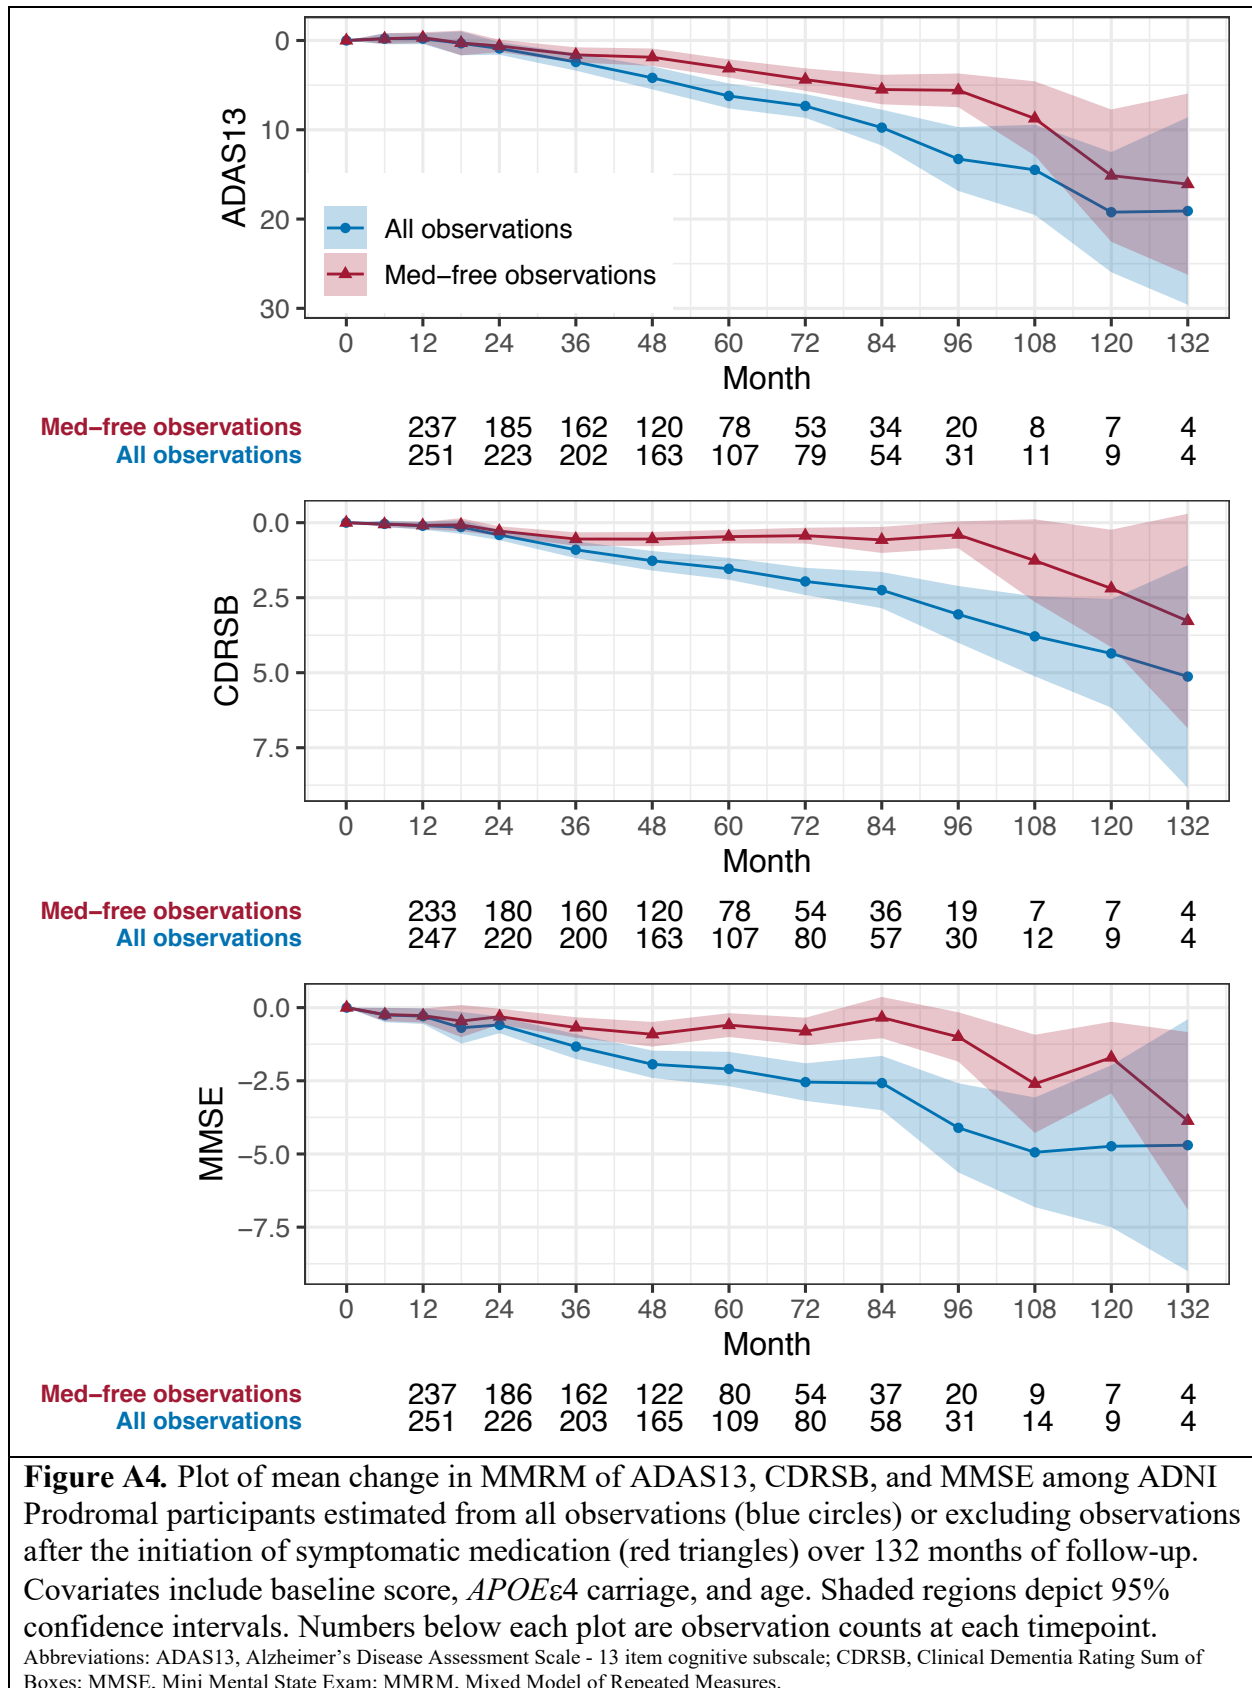

Supplement: NIHMS1719754-supplement-supinfo.pdf [file NIHMS1719754-supplement-supinfo.pdf]
